# Supplementary material
Source: Springer Nature journal article supplement (https://www.springermedizin.de/resource/supplementary/12960_2003_8_MOESM8_ESM.pdf/9569742)
Supplement: MOESM8 [file 9569742]

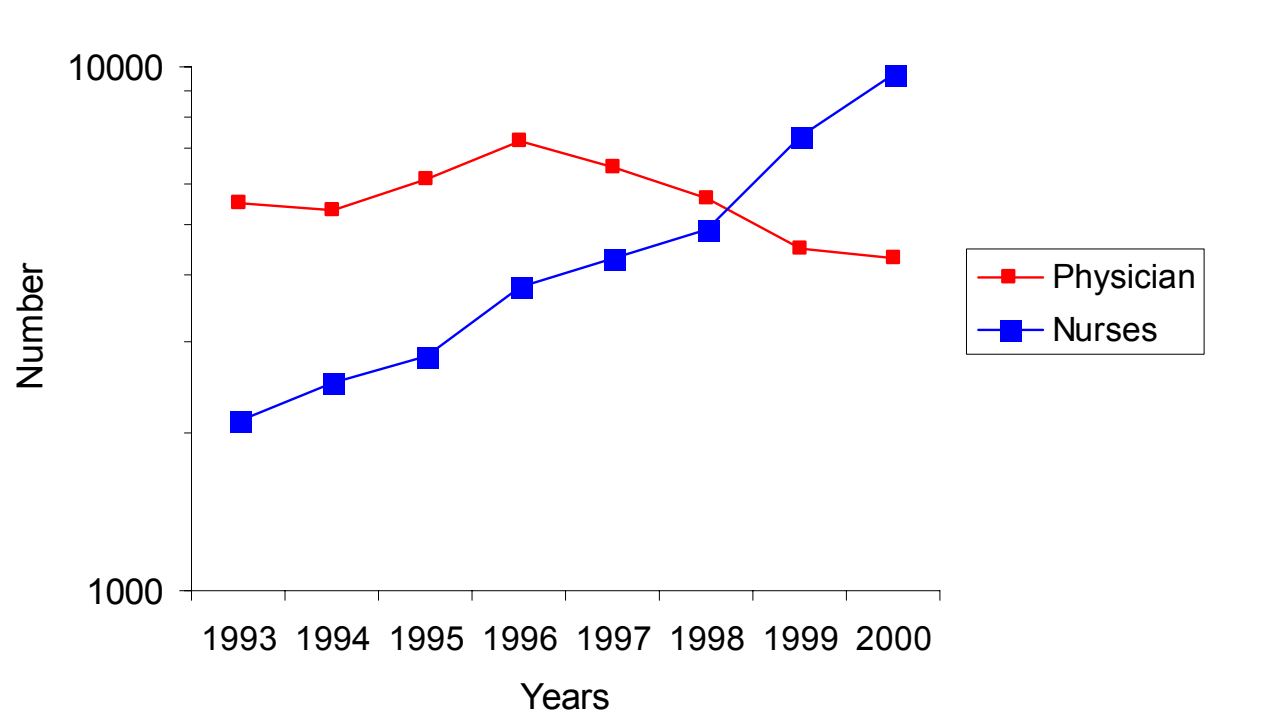

Sources: General Medical Council: United Kingdom Central Council for Nursing, Midwifery and Health Visiting
